# Supplementary material
Source: PubMed Central journal article supplement (PMC2515929)
Supplement: NIHMS61116-supplement-si20060105_043.pdf [file NIHMS61116-supplement-si20060105_043.pdf]

## Supporting Information

- for -

### ***“A High-Throughput, High-Resolution Pathway to the Study of Site-Selective DNA Binding Agents: Analysis of a ‘Highly Twisted’ Benzimidazole-Diamidine”***

Kristie D. Goodwin,<sup>§</sup> Mark A. Lewis,<sup>‡</sup> Fariel A. Tanious,<sup>†</sup> Richard R. Tidwell,<sup>◇</sup> W. David Wilson,<sup>†</sup>  
Millie M. Georgiadis,<sup>\*,§</sup> and Eric C. Long,<sup>\*,‡</sup>

*Contribution from the Departments of Biochemistry & Molecular Biology,<sup>§</sup> Indiana University School of Medicine and Chemistry & Chemical Biology,<sup>‡</sup> Purdue School of Science, Indiana University-Purdue University Indianapolis (IUPUI), Indianapolis, Indiana 46202, Department of Chemistry,<sup>†</sup> Georgia State University, P.O. Box 4098, Atlanta Georgia 30302-4098, and the Department of Pathology,<sup>◇</sup> University of North Carolina, Chapel Hill, North Carolina 27599*

**Figure S1.** Surface Plasmon Resonance Analyses...Pages **S2-S3**

**Table S1.** Hydrogen bonds between RT29 and AATT DNA...Page **S4**.

**Table S2.** Hydrogen bonds between RT29 and ATTC DNA...Page **S4**.

**Table S3.** Hydrogen bonds between RT and AATT DNA in the presence and absence of RT29...Page **S5**.

**Table S4.** Hydrogen bonds between RT and ATTC DNA in the presence and absence of RT29...Page **S5**.

**Figure S1. Biosensor-SPR Results for RT29 Binding.** Experiments were conducted in 0.01 M MES, 0.001M EDTA, 0.2M NaCl, pH 6.2, using biotin labeled DNA hairpins of the following compositions:

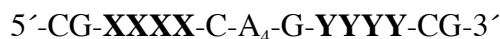

where:

|        |        |
|--------|--------|
| -XXXX- | -YYYY- |
| -AATT- | -AATT- |
| -ATTC- | -GAAT- |
| -AGAT- | -ATCT- |

Biosensor-SPR experiments to determine **RT29**-DNA binding constants (K) were conducted with a BIAcore 3000 (Biacore, Uppsala, Sweden) instrument as described previously (Davis, T. M., and Wilson, *Methods Enzymol.* **2001**, *340*, 22-51). Briefly, the 5'-biotin labeled DNA hairpins shown above were immobilized on four channel BIAcore SA sensor chips via non-covalent streptavidin capture. Three flow cells contained the DNA samples and one flow cell was left blank as a reference. For the DNA samples with rapid **RT29** binding kinetics, steady-state binding studies were carried out by averaging the resonance unit values (RU) over a selected time region at different compound concentrations. The K values were obtained from the best fit of RU versus free compound concentration with a one-site binding model. Fits with more than one site did not improve the correlation coefficient or residuals significantly. Kinetics analyses to obtain K were performed by global fitting of the binding data with mass transport limited 1:1 kinetic binding models (Karlsson, R., *J. Mol. Recognit.* **1999**, *12*, 285-292).

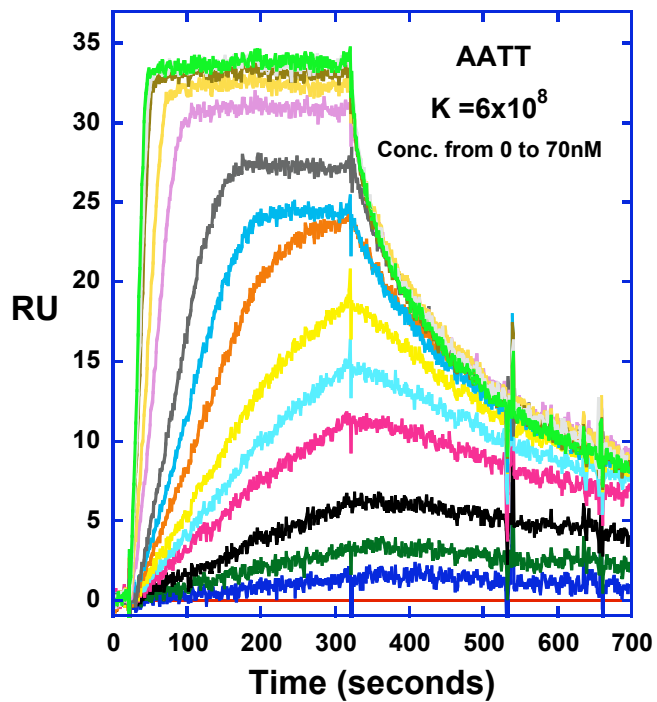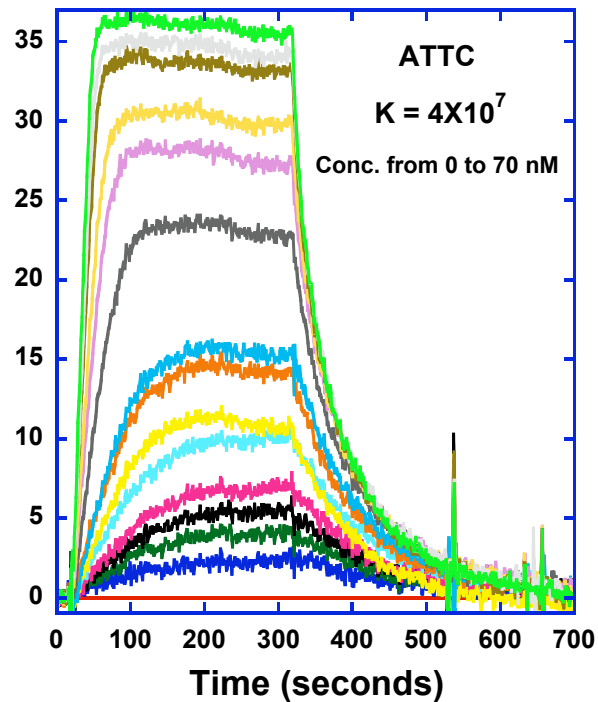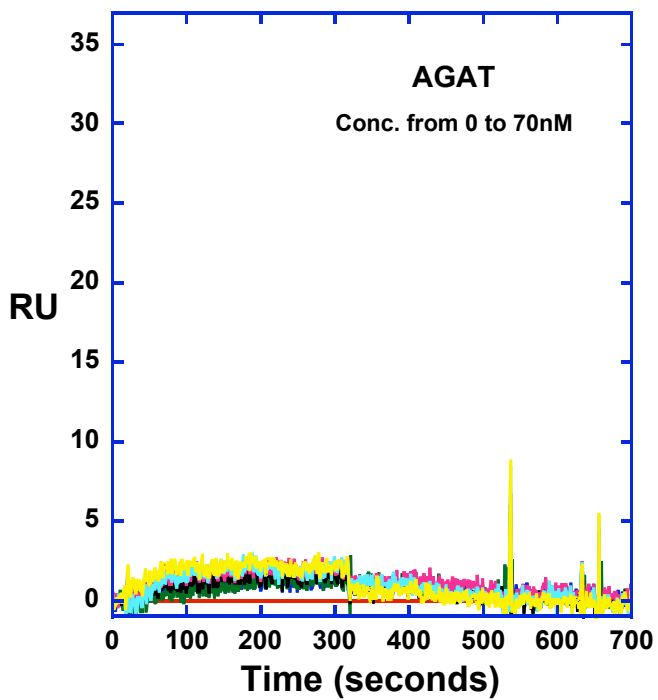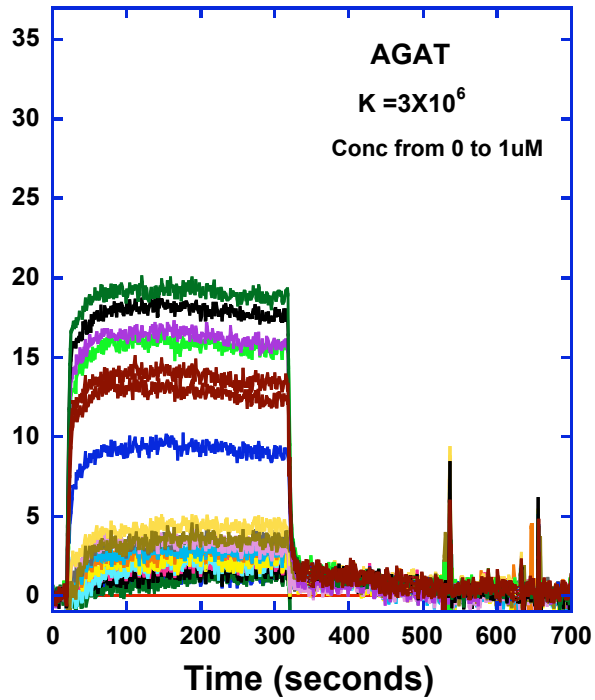

**Table S1. Hydrogen bonds between RT29 and AATT DNA.**

---

| <b>RT29 atom</b> | <b>DNA atom</b>              | <b>Chain</b> | <b>Distance (Å)</b> |
|------------------|------------------------------|--------------|---------------------|
| N1               | O4' of A5                    | B            | 2.8                 |
| N3               | O4' of T6                    | B            | 3.3                 |
| N3               | O2 of T13                    | G            | 3.0                 |
| N5               | H <sub>2</sub> O..N3 of A10  | G            | 2.6/2.6             |
| N5               | H <sub>2</sub> O..O4' of A11 | G            | 2.6/2.9             |

---

**Table S2. Hydrogen bonds between RT29 and ATTC DNA.**

---

| <b>RT29 atom</b> | <b>DNA atom</b>              | <b>Chain</b> | <b>Distance (Å)</b> |
|------------------|------------------------------|--------------|---------------------|
| N1               | O4' of A5                    | B            | 2.9                 |
| N2               | H <sub>2</sub> O..N3 of A14  | G            | 3.0/2.7             |
| N2               | H <sub>2</sub> O..O4' of A15 | G            | 3.0/3.3             |
| N3               | O4' of A6                    | B            | 3.3                 |
| N5               | O4' of T11                   | G            | 3.2                 |

---

**Table S3. Hydrogen bonds between RT and AATT DNA in the presence and absence of RT29.**

| Residue | Atom             | Atom | Nucleotide | Distance (Å) | RT29 |
|---------|------------------|------|------------|--------------|------|
| Tyr 64  | OH               | O2   | C1         | 3.2          | +    |
|         |                  | O4'  | T2         | 3.4          | --   |
| Asp 114 | O <sup>□</sup> 2 | N2   | G16        | 3.0/3.3      | --/+ |
| Leu 115 | N                | O3'  | G16        | 3.0/2.9      | --/+ |
| Arg 116 | N <sup>□</sup> 1 | O2   | T2         | 3.4          | +    |
|         |                  | O4'  | T3         | 2.8/3.0      | --/+ |
|         |                  | O2   | T3         | 3.3          | +    |
|         | N <sup>□</sup> 2 | N2   | G16        | 3.2/3.3      | --/+ |
|         |                  | O2   | T2         | 2.7/2.8      | --/+ |
|         |                  | O4'  | T3         | 3.3/3.4      | --/+ |
| Gly 191 | O                | O3'  | G16        | 2.9/3.1      | --/+ |

**Table S4. Hydrogen bonds between RT and ATTC DNA in the presence and absence of RT29.**

| Residue    | Atom             | Atom                  | Nucleotide | Distance (Å) | RT29 |
|------------|------------------|-----------------------|------------|--------------|------|
| Tyr 64a*   | OH               | O2                    | C1         | 3.1/3.3      | -/+  |
| Tyr 64a,b* | OH               | H <sub>2</sub> O..N2  | G16        | 2.5,2.6..3.4 | +    |
|            |                  | H <sub>2</sub> O..O4' | T2         | 2.5,2.6..3.3 | +    |
| Asp 114    | O <sup>□</sup> 2 | N2                    | G16        | 3.0/3.0      | -/+  |
|            | OH               | H <sub>2</sub> O..N2  | G16        | 2.7..3.4     | +    |
|            |                  | H <sub>2</sub> O..O4' | T2         | 2.7..3.3     | +    |
| Leu 115    | N                | O3'                   | G16        | 3.0/3.0      | -/+  |
| Arg 116    | N <sup>□</sup> 1 | O4'                   | T3         | 2.7/2.9      | -/+  |
|            |                  | O2                    | T3         | 3.4/3.2      | -/+  |
|            | N <sup>□</sup> 2 | N2                    | G16        | 3.2/3.2      | -/+  |
|            |                  | O2                    | T2         | 2.7/2.6      | -/+  |
|            |                  | O4'                   | T3         | 3.3/3.3      | -/+  |
| Gly 191    | O                | O3'                   | G16        | 2.9/2.9      | -/+  |
